# Supplementary material for: Nonparametric Risk and Nonparametric Odds in Quantitative Genetic Association Studies
Source: PubMed Central journal article supplement (PMC5378889; doi:10.1038/srep12105), 2015-07-15

Online Supplementary Material for  
**Nonparametric Risk and Nonparametric Odds in Quantitative  
Genetic Association Studies**

Wei Zhang and Qizhai Li

**Contents**

1. Some technical details of the obtained statistics.
  - 1.1. Theorem.
  - 1.2. Procedure of testing  $\lambda_1 = \lambda_{12}$
  - 1.3. Derivation of estimate for the variance of  $\hat{f}_1$  and  $\hat{f}_2$ .
  - 1.4. Estimates of the covariances for  $Z_R$ ,  $Z_A$  and  $Z_D$  under  $H_0$ .
2. Additional simulation results without considering the covariates.
3. Additional simulation results for sample size  $n = 1000$  and  $n = 500$ .
4. Estimation procedures considering the covariates.
5. Simulation studies considering the covariates.
6. The empirical type I error rates under the nominal significance level of 0.0005.
7. P-values of KW-A, F-A,  $Z_A$  and MAX3 for 25 SNPs in the gene PTPN22 and 45 SNPs in the genomic region of 6p21.33.
8. Simulation results for the random error term following the normal distribution.
9. Simulation results for the random error term following the centralized  $t$ -distribution.

## 1. Some technical details of the obtained statistics.

### 1.1. Theorem.

Denote  $\xi = (f_1, f_{12})^\tau$  and  $\hat{\xi} = (\hat{f}_1, \hat{f}_{12})^\tau$ . When  $\min\{n_0, n_1, n_2\} \rightarrow \infty$ ,

1)  $(\hat{f}_i - f_i)/\hat{\sigma}_i \xrightarrow{dist.} N(0, 1), i = 1, 2$ , and  $(\hat{f}_{12} - f_{12})/\hat{\sigma}_{12} \xrightarrow{dist.} N(0, 1)$ .

2)  $\hat{\Delta}^{-\frac{1}{2}}(\hat{\xi} - \xi)$  asymptotically follows a bivariate normal distribution with zero mean vector and covariance matrix  $I_2$ , where  $I_2$  is a  $2 \times 2$  identify matrix.

**Proof.** Since  $\hat{f}_i - f_i$  and  $\hat{\xi} - \xi$  are U-statistics, they converge to the normal distributions.

### 1.2. Procedure of testing $\lambda_1 = \lambda_{12}$ .

From the above Theorem, we know that  $(f_1, f_{12})^\tau$  asymptotically follows a bivariate normal distribution. Then we can use the statistic  $\frac{f_1 - f_{12}}{\sqrt{\hat{\sigma}_1^2 - 2\hat{\sigma}_{112}^2 + \hat{\sigma}_{12}^2}}$  to test  $\lambda_1 = \lambda_{12}$ . The two-sided p-value is

$$\text{p-value} = 2 \left( 1 - \Phi \left( |\hat{f}_1 - \hat{f}_{12}| / \sqrt{\hat{\sigma}_1^2 - 2\hat{\sigma}_{112}^2 + \hat{\sigma}_{12}^2} \right) \right).$$

### 1.3. Derivation of estimate for the variance of $\hat{f}_1$ and $\hat{f}_2$ .

Since  $\hat{f}_1 = \frac{1}{n_0 n_1} \sum_{i=1}^{n_0} \sum_{j=n_0+1}^{n_0+n_1} I(y_i < y_j)$ , we have

$$\begin{aligned} \text{Var}(\hat{f}_1) &= E \left( \frac{1}{n_0 n_1} \sum_{i=1}^{n_0} \sum_{j=n_0+1}^{n_0+n_1} I(y_i < y_j) - f_1 \right)^2 \\ &= \frac{1}{n_0^2 n_1^2} \sum_{i_1=1}^{n_0} \sum_{i_2=1}^{n_0} \sum_{j_1=n_0+1}^{n_0+n_1} \sum_{j_2=n_0+1}^{n_0+n_1} E [I(y_{i_1} < y_{j_1}) - f_1] [I(y_{i_2} < y_{j_2}) - f_1]. \end{aligned}$$

Define  $\xi^{(i_1, i_2, j_1, j_2)} = E [I(y_{i_1} < y_{j_1}) - f_1] [I(y_{i_2} < y_{j_2}) - f_1]$ , for  $1 \leq i_1, i_2 \leq n_0, n_0 + 1 \leq j_1, j_2 \leq n_0 + n_1$ . Then we have

when  $i_1 \neq i_2, j_1 \neq j_2$ , where  $1 \leq i_1, i_2 \leq n_0, n_0 + 1 \leq j_1, j_2 \leq n_0 + n_1$ ,  $\xi^{(i_1, i_2, j_1, j_2)} = E [I(y_{i_1} < y_{j_1}) - f_1] E [I(y_{i_2} < y_{j_2}) - f_1]$ ;

when  $i_1 = i_2 = i, j_1 \neq j_2$ ,

$$\begin{aligned} \xi^{(i_1, i_2, j_1, j_2)} &= E \left\{ E \left\{ [I(y_{i_1} < y_{j_1}) - f_1] [I(y_{i_2} < y_{j_2}) - f_1] | y_i \right\} \right\} \\ &= E \left\{ E [I(y_i < y_{j_1}) - f_1] E [I(y_i < y_{j_2}) - f_1] \right\} \\ &= E \left[ 1 - F_1(Y_0) - f_1 \right]^2; \end{aligned}$$

when  $i_1 \neq i_2$ ,  $j_1 = j_2 = j$ ,

$$\begin{aligned}\xi^{(i_1, i_2, j_1, j_2)} &= E\left\{E\left\{[I(y_{i_1} < y_{j_1}) - f_1][I(y_{i_2} < y_{j_2}) - f_1] \mid y_j\right\}\right\} \\ &= E\left\{E[I(y_{i_1} < y_j) - f_1]E[I(y_{i_2} < y_j) - f_1]\right\} \\ &= E\left[F_0(Y_1) - f_1\right]^2;\end{aligned}$$

and when  $i_1 = i_2 = i$ ,  $j_1 = j_2 = j$ ,

$$\begin{aligned}\xi^{(i_1, i_2, j_1, j_2)} &= E[I(y_i < y_j) - f_1][I(y_i < y_j) - f_1] \\ &= E[I(y_i < y_j)] - 2f_1E[I(y_i < y_j)] + f_1^2 \\ &= f_1 - f_1^2.\end{aligned}$$

Thus

$$\begin{aligned}\text{Var}(\hat{f}_1) &= \frac{1}{n_0 n_1} \left\{ (n_1 - 1)E\left[1 - F_1(Y_0) - f_1\right]^2 + (n_0 - 1)E\left[F_0(Y_1) - f_1\right]^2 + (f_1 - f_1^2) \right\} \\ &= \frac{n_1 - 1}{n_0 n_1} E\left[1 - F_1(Y_0) - f_1\right]^2 + \frac{n_0 - 1}{n_0 n_1} E\left[F_0(Y_1) - f_1\right]^2 + \frac{1}{n_0 n_1} (f_1 - f_1^2)\end{aligned}$$

So the empirical estimate of  $\text{Var}(\hat{f}_1)$  under  $H_0$  is

$$\hat{\sigma}_1^2 = \frac{n_1 - 1}{n_0^2 n_1} \sum_{i=1}^{n_0} \left[ \frac{1}{n_1} \sum_{j=n_0+1}^{n_0+n_1} I(y_i < y_j) - 1/2 \right]^2 + \frac{n_0 - 1}{n_0 n_1^2} \sum_{j=n_0+1}^{n_0+n_1} \left[ \frac{1}{n_0} \sum_{i=1}^{n_0} I(y_i < y_j) - 1/2 \right]^2 + \frac{1}{4n_0 n_1}.$$

Similarly, we can derive the empirical estimate of  $\text{Var}(\hat{f}_2)$ .

#### 1.4. Estimates of the covariances for $Z_R$ , $Z_A$ and $Z_D$ under $H_0$

Using the notations in Table 5, the covariance of  $Z_R$  and  $Z_A$  under  $H_0$  is

$$\gamma_{RA} = \widehat{\text{cov}}(Z_R, Z_A) = \frac{w_1 \hat{E}_{H_0} \left( (\hat{f}_{2R} - 1/2)(\hat{f}_1 - 1/2) \right)}{\hat{\sigma}_{2R} \hat{\sigma}_{1A}} + \frac{w_2 \hat{E}_{H_0} \left( (\hat{f}_{2R} - 1/2)(\hat{f}_{12} - 1/2) \right)}{\hat{\sigma}_{2R} \hat{\sigma}_{1A}},$$

where

$$\begin{aligned}\hat{E}_{H_0} \left( (\hat{f}_{2R} - 1/2)(\hat{f}_1 - 1/2) \right) &= \frac{1}{n_0(n_0 + n_1)} \sum_{i=1}^{n_0} \left[ \frac{1}{n_1} \sum_{j=n_0+1}^{n_0+n_1} (I\{y_i < y_j\} - 1/2) \right] \left[ \frac{1}{n_2} \sum_{k=n_0+n_1+1}^n (I\{y_i < y_k\} - 1/2) \right] \\ &\quad + \frac{1}{n_1(n_0 + n_1)} \sum_{j=n_0+1}^{n_0+n_1} \left[ \frac{1}{n_0} \sum_{i=1}^{n_0} (I\{y_i < y_j\} - 1/2) \right] \left[ \frac{1}{n_2} \sum_{k=n_0+n_1+1}^n (I\{y_j < y_k\} - 1/2) \right], \\ \hat{E}_{H_0} \left( (\hat{f}_{2R} - 1/2)(\hat{f}_{12} - 1/2) \right) &\end{aligned}$$

$$= \frac{n_0}{(n_0 + n_1)n_2^2} \sum_{k=n_0+n_1+1}^n \left[ \frac{1}{n_0} \sum_{i=1}^{n_0} (I\{y_i < y_k\} - 1/2) \right] \left[ \frac{1}{n_1} \sum_{j=n_0+1}^{n_0+n_1} (I\{y_j < y_k\} - 1/2) \right] + \frac{n_1}{n_0 + n_1} \tilde{\sigma}_{12}^2,$$

and

$$\begin{aligned} \tilde{\sigma}_{12}^2 &= \frac{n_2 - 1}{n_1^2 n_2} \sum_{j=n_0+1}^{n_0+n_1} \left[ \frac{1}{n_2} \sum_{k=n_0+n_1+1}^n I(y_j < y_k) - \frac{1}{2} \right]^2 \\ &+ \frac{n_1 - 1}{n_1 n_2^2} \sum_{k=n_0+n_1+1}^n \left[ \frac{1}{n_1} \sum_{j=n_0+1}^{n_0+n_1} I(y_j < y_k) - \frac{1}{2} \right]^2 + \frac{1}{4n_1 n_2}. \end{aligned}$$

The covariance of  $Z_A$  and  $Z_D$  under  $H_0$  is

$$\gamma_{AD} = \widehat{\text{cov}}(Z_A, Z_D) = \frac{w_1 \widehat{E}_{H_0} \left( (\hat{f}_1 - 1/2)(\hat{f}_{1D} - 1/2) \right)}{\hat{\sigma}_{1A} \hat{\sigma}_{1D}} + \frac{w_2 \widehat{E}_{H_0} \left( (\hat{f}_{12} - 1/2)(\hat{f}_{1D} - 1/2) \right)}{\hat{\sigma}_{1A} \hat{\sigma}_{1D}},$$

where

$$\begin{aligned} &\widehat{E}_{H_0} \left( (\hat{f}_1 - 1/2)(\hat{f}_{1D} - 1/2) \right) \\ &= \frac{n_2}{(n_1 + n_2)n_0^2} \sum_{i=1}^{n_0} \left[ \frac{1}{n_1} \sum_{j=n_0+1}^{n_0+n_1} (I\{y_i < y_j\} - 1/2) \right] \left[ \frac{1}{n_2} \sum_{k=n_0+n_1+1}^n (I\{y_i < y_k\} - 1/2) \right] + \\ &\frac{n_1}{n_1 + n_2} \tilde{\sigma}_1^2, \end{aligned}$$

$$\tilde{\sigma}_1^2 = \frac{n_1 - 1}{n_0^2 n_1} \sum_{i=1}^{n_0} \left[ \frac{1}{n_1} \sum_{j=n_0+1}^{n_0+n_1} I(y_i < y_j) - \frac{1}{2} \right]^2 + \frac{n_0 - 1}{n_0 n_1^2} \sum_{j=n_0+1}^{n_0+n_1} \left[ \frac{1}{n_0} \sum_{i=1}^{n_0} I(y_i < y_j) - \frac{1}{2} \right]^2 + \frac{1}{4n_0 n_1}$$

and

$$\begin{aligned} &\widehat{E}_{H_0} \left( (\hat{f}_{12} - 1/2)(\hat{f}_{1D} - 1/2) \right) \\ &= \frac{1}{n_1(n_1 + n_2)} \sum_{j=n_0+1}^{n_0+n_1} \left[ \frac{1}{n_0} \sum_{i=1}^{n_0} (I\{y_i < y_j\} - 1/2) \right] \left[ \frac{1}{n_2} \sum_{k=n_0+n_1+1}^n (I\{y_j < y_k\} - 1/2) \right] \\ &+ \frac{1}{n_2(n_1 + n_2)} \sum_{k=n_0+n_1+1}^n \left[ \frac{1}{n_0} \sum_{i=1}^{n_0} (I\{y_i < y_k\} - 1/2) \right] \left[ \frac{1}{n_1} \sum_{j=n_0+1}^{n_0+n_1} (I\{y_j < y_k\} - 1/2) \right]. \end{aligned}$$

The covariance of  $Z_R$  and  $Z_D$  under  $H_0$  is

$$\gamma_{RD} = \widehat{\text{cov}}(Z_R, Z_D) = \frac{\widehat{E}_{H_0} \left( (\hat{f}_{2R} - 1/2)(\hat{f}_{1D} - 1/2) \right)}{\hat{\sigma}_{2R} \hat{\sigma}_{1D}},$$

where

$$\widehat{E}_{H_0} \left( (\hat{f}_{2R} - 1/2)(\hat{f}_{1D} - 1/2) \right)$$

$$\begin{aligned}
&= \frac{n_1}{n_0(n_0+n_1)(n_1+n_2)} \sum_{i=1}^{n_0} \left[ \frac{1}{n_1} \sum_{j=n_0+1}^{n_0+n_1} (I\{y_j < y_k\} - 1/2) \right] \left[ \frac{1}{n_2} \sum_{k=n_0+n_1+1}^n (I\{y_i < y_k\} - 1/2) \right] \\
&+ \frac{1}{(n_0+n_1)(n_1+n_2)} \sum_{j=n_0+1}^{n_0+n_1} \left[ \frac{1}{n_0} \sum_{i=1}^{n_0} (I\{y_i < y_j\} - 1/2) \right] \left[ \frac{1}{n_2} \sum_{k=n_0+n_1+1}^n (I\{y_j < y_k\} - 1/2) \right] \\
&+ \frac{n_1}{n_2(n_0+n_1)(n_1+n_2)} \sum_{k=n_0+n_1+1}^n \left[ \frac{1}{n_0} \sum_{i=1}^{n_0} (I\{y_i < y_k\} - 1/2) \right] \left[ \frac{1}{n_1} \sum_{j=n_0+1}^{n_0+n_1} (I\{y_j < y_k\} - 1/2) \right] \\
&+ \frac{n_0 n_2 \tilde{\sigma}_2^2}{(n_0+n_1)(n_1+n_2)},
\end{aligned}$$

and

$$\tilde{\sigma}_2^2 = \frac{n_2-1}{n_0^2 n_2} \sum_{i=1}^{n_0} \left[ \frac{1}{n_2} \sum_{k=n_0+n_1+1}^{n_0+n_1+n_2} I(y_i < y_k) - \frac{1}{2} \right]^2 + \frac{n_0-1}{n_0 n_2^2} \sum_{k=n_0+n_1+1}^{n_0+n_1+n_2} \left[ \frac{1}{n_0} \sum_{i=1}^{n_0} I(y_i < y_k) - \frac{1}{2} \right]^2 + \frac{1}{4n_0 n_2}.$$

## 2. Additional simulation results without considering the covariates.

### Tables

1) Tables S1 and S2 show the empirical results of the point and confidence interval estimation of  $\lambda_1$  and  $\lambda_2$  for  $\beta_1 = 0.25$  and  $\beta_1 = 0.5$ , respectively.

2) Tables S3 and S4 show the empirical results of the point and confidence interval estimation of  $\lambda_{2R}$  for  $\beta_1 = 0.25$  and  $\beta_1 = 0.5$ , respectively, under the recessive model.

3) Tables S5 and S6 show the empirical results of the point and confidence interval estimation of  $\lambda_{1A}$  for  $\beta_1 = 0.25$  and  $\beta_1 = 0.5$ , respectively, under the additive model.

4) Tables S7 and S8 show the empirical results of the point and confidence interval estimation of  $\lambda_{1D}$  for  $\beta_1 = 0.25$  and  $\beta_1 = 0.5$ , respectively, under the dominant model.

### Results

In Tables S1 to S8, we report the empirical biases, the square root of mean square errors (sMSEs), the cover probabilities (CPs) and the interval lengths (ILs) of the Standard Interval, the Wilson Interval and the Log-Delta Interval. From these tables, we find that the sMSE is decreasing with the increasing of the minor allele frequency (MAF) overall. The three interval estimation methods behave well with their empirical CPs being close to the nominal level of 95% when the MAFs are large. For instance, when  $\beta_1 = 0.25$  and  $\text{MAF} = 0.25$ , the coverage probabilities of the Standard Interval, the Wilson Interval and the Log-Delta Interval for  $\lambda_2$  are 94.6%, 94.7% and 94.7%, respectively. When the MAF is small, for example,  $\text{MAF} = 0.05$ , the performances of the above three procedures are optimistic to infer  $\lambda_2$ . Their empirical CPs are less than 95%. For example, when  $\beta_1 = 0.25$  and  $\text{MAF} = 0.05$ , the empirical CPs of the Standard Interval, the Wilson Interval and the Log-Delta Interval for  $\lambda_2$  are, respectively, 0.824, 0.844 and 0.848. This is because the number of subjects with genotype 2 is very small (the mean number of subjects with genotype 2 is 3.75 for  $n = 1,500$ ), the asymptotic statistical property does not hold. We also find that the Wilson Interval and the Log-Delta Interval have almost the same performances. Overall, both the Log-Delta and Wilson Intervals work better than Standard Interval. In general, the Wilson Interval and the Log-Delta Interval have

larger CP and shorter IL than the Standard Interval.

Table S1. The empirical biases, sMSE, CP and IL for  $\beta_1 = 0.25$ .

| MAF                                | Bias    | sMSE  | CP                | IL    | CP              | IL    | CP                 | IL    |
|------------------------------------|---------|-------|-------------------|-------|-----------------|-------|--------------------|-------|
|                                    |         |       | Standard Interval |       | Wilson Interval |       | Log-Delta Interval |       |
| For inferring $\lambda_1 (= 1.43)$ |         |       |                   |       |                 |       |                    |       |
| 0.10                               | 0.0465  | 0.113 | 0.927             | 0.408 | 0.933           | 0.406 | 0.933              | 0.406 |
| 0.15                               | -0.0085 | 0.092 | 0.953             | 0.369 | 0.951           | 0.367 | 0.951              | 0.367 |
| 0.20                               | -0.0122 | 0.092 | 0.937             | 0.353 | 0.938           | 0.351 | 0.938              | 0.352 |
| 0.25                               | -0.0016 | 0.087 | 0.948             | 0.348 | 0.950           | 0.347 | 0.950              | 0.348 |
| 0.30                               | 0.0384  | 0.096 | 0.936             | 0.354 | 0.939           | 0.353 | 0.939              | 0.353 |
| 0.35                               | 0.0088  | 0.091 | 0.953             | 0.364 | 0.954           | 0.363 | 0.955              | 0.363 |
| 0.40                               | -0.0232 | 0.098 | 0.944             | 0.382 | 0.944           | 0.380 | 0.944              | 0.380 |
| 0.45                               | -0.0052 | 0.101 | 0.948             | 0.404 | 0.947           | 0.402 | 0.948              | 0.402 |
| 0.50                               | -0.0030 | 0.109 | 0.960             | 0.435 | 0.960           | 0.433 | 0.961              | 0.433 |
| For inferring $\lambda_2 (= 1.97)$ |         |       |                   |       |                 |       |                    |       |
| 0.10                               | 0.0651  | 0.553 | 0.922             | 2.253 | 0.925           | 2.025 | 0.926              | 2.048 |
| 0.15                               | 0.0160  | 0.350 | 0.932             | 1.382 | 0.932           | 1.329 | 0.932              | 1.336 |
| 0.20                               | 0.0383  | 0.268 | 0.943             | 1.039 | 0.945           | 1.017 | 0.945              | 1.019 |
| 0.25                               | -0.0242 | 0.217 | 0.946             | 0.856 | 0.947           | 0.844 | 0.947              | 0.845 |
| 0.30                               | -0.0038 | 0.184 | 0.953             | 0.757 | 0.953           | 0.748 | 0.953              | 0.749 |
| 0.35                               | 0.0373  | 0.176 | 0.953             | 0.704 | 0.954           | 0.697 | 0.954              | 0.698 |
| 0.40                               | 0.0321  | 0.174 | 0.948             | 0.681 | 0.950           | 0.674 | 0.950              | 0.675 |
| 0.45                               | -0.0200 | 0.168 | 0.951             | 0.677 | 0.949           | 0.671 | 0.949              | 0.672 |
| 0.50                               | -0.0032 | 0.176 | 0.951             | 0.700 | 0.950           | 0.694 | 0.950              | 0.695 |

Table S2. The empirical biases, sMSE, CP and IL for  $\beta_1 = 0.5$ .

| MAF                                | Bias    | sMSE  | Standard Interval |       | Wilson Interval |       | Log-Delta Interval |       |
|------------------------------------|---------|-------|-------------------|-------|-----------------|-------|--------------------|-------|
|                                    |         |       | CP                | IL    | CP              | IL    | CP                 | IL    |
| For inferring $\lambda_1 (= 1.97)$ |         |       |                   |       |                 |       |                    |       |
| 0.10                               | 0.0174  | 0.141 | 0.946             | 0.547 | 0.946           | 0.543 | 0.947              | 0.544 |
| 0.15                               | -0.0047 | 0.126 | 0.953             | 0.504 | 0.952           | 0.501 | 0.952              | 0.501 |
| 0.20                               | -0.0212 | 0.127 | 0.944             | 0.491 | 0.944           | 0.488 | 0.944              | 0.489 |
| 0.25                               | -0.0025 | 0.124 | 0.945             | 0.494 | 0.945           | 0.492 | 0.945              | 0.492 |
| 0.30                               | 0.0072  | 0.125 | 0.956             | 0.506 | 0.955           | 0.504 | 0.955              | 0.504 |
| 0.35                               | 0.0141  | 0.132 | 0.950             | 0.528 | 0.955           | 0.525 | 0.955              | 0.525 |
| 0.40                               | 0.0010  | 0.143 | 0.951             | 0.558 | 0.950           | 0.555 | 0.950              | 0.555 |
| 0.45                               | -0.0010 | 0.154 | 0.945             | 0.595 | 0.944           | 0.591 | 0.944              | 0.591 |
| 0.50                               | -0.0180 | 0.164 | 0.949             | 0.647 | 0.950           | 0.642 | 0.950              | 0.643 |
| For inferring $\lambda_2 (= 3.58)$ |         |       |                   |       |                 |       |                    |       |
| 0.10                               | 0.1701  | 0.978 | 0.910             | 3.688 | 0.921           | 3.353 | 0.924              | 3.387 |
| 0.15                               | 0.0596  | 0.589 | 0.940             | 2.314 | 0.942           | 2.204 | 0.943              | 2.212 |
| 0.20                               | 0.0011  | 0.447 | 0.947             | 1.779 | 0.945           | 1.728 | 0.945              | 1.732 |
| 0.25                               | 0.0960  | 0.388 | 0.936             | 1.515 | 0.947           | 1.483 | 0.948              | 1.486 |
| 0.30                               | 0.0085  | 0.350 | 0.946             | 1.394 | 0.949           | 1.369 | 0.949              | 1.371 |
| 0.35                               | 0.0876  | 0.346 | 0.943             | 1.342 | 0.951           | 1.320 | 0.951              | 1.322 |
| 0.40                               | 0.0698  | 0.345 | 0.940             | 1.346 | 0.946           | 1.324 | 0.946              | 1.326 |
| 0.45                               | 0.0982  | 0.371 | 0.932             | 1.379 | 0.938           | 1.355 | 0.938              | 1.357 |
| 0.50                               | 0.0489  | 0.372 | 0.949             | 1.467 | 0.952           | 1.439 | 0.952              | 1.441 |



Table S3. The empirical biases, sMSEs, CP and IL for  $\beta_1 = \ln 1.2$  under the recessive model.

| MAF                                | Bias   | sMSE  | CP                | IL    | CP              | IL    | CP                 | IL    |
|------------------------------------|--------|-------|-------------------|-------|-----------------|-------|--------------------|-------|
|                                    |        |       | Standard Interval |       | Wilson Interval |       | Log-Delta Interval |       |
| For inferring $\lambda_2 (= 1.97)$ |        |       |                   |       |                 |       |                    |       |
| 0.10                               | 0.0705 | 0.555 | 0.919             | 2.302 | 0.925           | 2.033 | 0.926              | 2.058 |
| 0.15                               | 0.0438 | 0.342 | 0.942             | 1.363 | 0.948           | 1.313 | 0.949              | 1.319 |
| 0.20                               | 0.0030 | 0.259 | 0.941             | 1.007 | 0.946           | 0.987 | 0.946              | 0.989 |
| 0.25                               | 0.0016 | 0.206 | 0.955             | 0.817 | 0.949           | 0.806 | 0.950              | 0.808 |
| 0.30                               | 0.0092 | 0.174 | 0.948             | 0.701 | 0.948           | 0.694 | 0.948              | 0.695 |
| 0.35                               | 0.0752 | 0.172 | 0.922             | 0.620 | 0.930           | 0.615 | 0.930              | 0.616 |
| 0.40                               | -0.010 | 0.144 | 0.947             | 0.566 | 0.946           | 0.563 | 0.947              | 0.563 |
| 0.45                               | -0.020 | 0.135 | 0.948             | 0.528 | 0.945           | 0.525 | 0.945              | 0.525 |
| 0.50                               | -0.005 | 0.129 | 0.945             | 0.503 | 0.943           | 0.501 | 0.943              | 0.501 |

Table S4. The empirical biases, sMSE, CP and IL for  $\beta_1 = \ln 1.4$  under the recessive model.

| MAF                                | Bias    | sMSE  | CP                | IL    | CP              | IL    | CP                 | IL    |
|------------------------------------|---------|-------|-------------------|-------|-----------------|-------|--------------------|-------|
|                                    |         |       | Standard Interval |       | Wilson Interval |       | Log-Delta Interval |       |
| For inferring $\lambda_2 (= 3.58)$ |         |       |                   |       |                 |       |                    |       |
| 0.10                               | 0.2629  | 0.971 | 0.915             | 3.898 | 0.924           | 3.351 | 0.925              | 3.383 |
| 0.15                               | 0.0535  | 0.593 | 0.933             | 2.264 | 0.930           | 2.160 | 0.931              | 2.168 |
| 0.20                               | 0.0326  | 0.423 | 0.951             | 1.701 | 0.949           | 1.657 | 0.949              | 1.661 |
| 0.25                               | 0.0544  | 0.367 | 0.927             | 1.401 | 0.930           | 1.376 | 0.931              | 1.378 |
| 0.30                               | 0.0458  | 0.314 | 0.946             | 1.225 | 0.946           | 1.208 | 0.946              | 1.210 |
| 0.35                               | 0.0121  | 0.281 | 0.951             | 1.109 | 0.952           | 1.096 | 0.952              | 1.097 |
| 0.40                               | -0.0157 | 0.270 | 0.942             | 1.036 | 0.941           | 1.025 | 0.942              | 1.026 |
| 0.45                               | 0.0088  | 0.252 | 0.949             | 0.989 | 0.950           | 0.980 | 0.950              | 0.981 |
| 0.50                               | 0.0028  | 0.238 | 0.963             | 0.959 | 0.962           | 0.950 | 0.962              | 0.951 |

Table S5. The empirical biases, sMSE, CP and IL for  $\beta_1 = 0.25$  under the additive model.

| MAF                                | Bias    | sMSE  | CP                | IL    | CP              | IL    | CP                 | IL    |
|------------------------------------|---------|-------|-------------------|-------|-----------------|-------|--------------------|-------|
|                                    |         |       | Standard Interval |       | Wilson Interval |       | Log-Delta Interval |       |
| For inferring $\lambda_1 (= 1.43)$ |         |       |                   |       |                 |       |                    |       |
| 0.10                               | 0.0049  | 0.092 | 0.947             | 0.357 | 0.947           | 0.356 | 0.947              | 0.356 |
| 0.15                               | -0.0153 | 0.080 | 0.938             | 0.306 | 0.938           | 0.305 | 0.938              | 0.305 |
| 0.20                               | 0.0082  | 0.072 | 0.945             | 0.278 | 0.945           | 0.277 | 0.945              | 0.277 |
| 0.25                               | -0.0013 | 0.065 | 0.957             | 0.260 | 0.957           | 0.260 | 0.957              | 0.260 |
| 0.30                               | -0.0029 | 0.062 | 0.954             | 0.249 | 0.954           | 0.249 | 0.954              | 0.249 |
| 0.35                               | 0.0144  | 0.065 | 0.940             | 0.243 | 0.940           | 0.243 | 0.940              | 0.243 |
| 0.40                               | -0.0012 | 0.060 | 0.954             | 0.239 | 0.953           | 0.239 | 0.953              | 0.239 |
| 0.45                               | -0.0018 | 0.061 | 0.939             | 0.239 | 0.939           | 0.239 | 0.939              | 0.239 |
| 0.50                               | -0.0084 | 0.061 | 0.945             | 0.241 | 0.943           | 0.240 | 0.943              | 0.240 |
| For inferring $\lambda_2 (= 1.97)$ |         |       |                   |       |                 |       |                    |       |
| 0.10                               | 0.1365  | 0.590 | 0.913             | 2.370 | 0.918           | 2.056 | 0.920              | 2.081 |
| 0.15                               | 0.0156  | 0.343 | 0.941             | 1.389 | 0.943           | 1.336 | 0.945              | 1.342 |
| 0.20                               | 0.0327  | 0.270 | 0.933             | 1.038 | 0.938           | 1.016 | 0.938              | 1.019 |
| 0.25                               | 0.0203  | 0.218 | 0.944             | 0.862 | 0.950           | 0.850 | 0.951              | 0.851 |
| 0.30                               | 0.0090  | 0.187 | 0.950             | 0.757 | 0.954           | 0.748 | 0.954              | 0.750 |
| 0.35                               | 0.0184  | 0.183 | 0.944             | 0.706 | 0.943           | 0.699 | 0.944              | 0.700 |
| 0.40                               | 0.0032  | 0.169 | 0.953             | 0.678 | 0.951           | 0.672 | 0.951              | 0.673 |
| 0.45                               | 0.0306  | 0.176 | 0.946             | 0.682 | 0.950           | 0.676 | 0.950              | 0.677 |
| 0.50                               | 0.0324  | 0.178 | 0.949             | 0.699 | 0.950           | 0.692 | 0.950              | 0.693 |

Table S6. The empirical biases, sMSE, CP and IL for  $\beta_1 = 0.5$  under the additive model.

| MAF                                | Bias    | sMSE  | CP                | IL    | CP              | IL    | CP                 | IL    |
|------------------------------------|---------|-------|-------------------|-------|-----------------|-------|--------------------|-------|
|                                    |         |       | Standard Interval |       | Wilson Interval |       | Log-Delta Interval |       |
| For inferring $\lambda_1 (= 1.97)$ |         |       |                   |       |                 |       |                    |       |
| 0.10                               | 0.0309  | 0.127 | 0.940             | 0.473 | 0.941           | 0.471 | 0.941              | 0.471 |
| 0.15                               | 0.0077  | 0.104 | 0.943             | 0.413 | 0.945           | 0.412 | 0.945              | 0.412 |
| 0.20                               | 0.0250  | 0.101 | 0.940             | 0.381 | 0.943           | 0.380 | 0.943              | 0.380 |
| 0.25                               | 0.0185  | 0.095 | 0.950             | 0.362 | 0.948           | 0.361 | 0.948              | 0.361 |
| 0.30                               | 0.0055  | 0.089 | 0.946             | 0.352 | 0.945           | 0.351 | 0.945              | 0.351 |
| 0.35                               | 0.0415  | 0.099 | 0.921             | 0.346 | 0.925           | 0.345 | 0.925              | 0.345 |
| 0.40                               | -0.0017 | 0.088 | 0.952             | 0.345 | 0.952           | 0.344 | 0.952              | 0.344 |
| 0.45                               | -0.0060 | 0.089 | 0.949             | 0.348 | 0.949           | 0.347 | 0.949              | 0.347 |
| 0.50                               | 0.0237  | 0.094 | 0.939             | 0.353 | 0.942           | 0.352 | 0.942              | 0.352 |
| For inferring $\lambda_2 (= 3.58)$ |         |       |                   |       |                 |       |                    |       |
| 0.10                               | 0.1818  | 0.934 | 0.907             | 3.877 | 0.912           | 3.376 | 0.914              | 3.409 |
| 0.15                               | 0.0790  | 0.579 | 0.932             | 2.311 | 0.941           | 2.201 | 0.943              | 2.210 |
| 0.20                               | 0.0969  | 0.455 | 0.945             | 1.782 | 0.950           | 1.731 | 0.951              | 1.735 |
| 0.25                               | 0.0229  | 0.381 | 0.945             | 1.516 | 0.945           | 1.484 | 0.945              | 1.487 |
| 0.30                               | 0.0670  | 0.355 | 0.948             | 1.398 | 0.949           | 1.373 | 0.949              | 1.376 |
| 0.35                               | 0.0237  | 0.345 | 0.942             | 1.341 | 0.942           | 1.319 | 0.942              | 1.320 |
| 0.40                               | 0.0638  | 0.344 | 0.946             | 1.338 | 0.950           | 1.316 | 0.951              | 1.318 |
| 0.45                               | 0.1122  | 0.374 | 0.931             | 1.387 | 0.936           | 1.363 | 0.937              | 1.365 |
| 0.50                               | 0.0645  | 0.375 | 0.946             | 1.469 | 0.951           | 1.440 | 0.952              | 1.443 |

Table S7. The empirical biases, sMSE, CP and IL for  $\beta_1 = 0.25$  under the dominant model.

| MAF                                            | Bias    | sMSE  | CP                | IL    | CP              | IL    | CP                 | IL    |
|------------------------------------------------|---------|-------|-------------------|-------|-----------------|-------|--------------------|-------|
|                                                |         |       | Standard Interval |       | Wilson Interval |       | Log-Delta Interval |       |
| For inferring $\lambda_1 (= \lambda_2 = 1.97)$ |         |       |                   |       |                 |       |                    |       |
| 0.10                                           | 0.0066  | 0.137 | 0.952             | 0.539 | 0.951           | 0.536 | 0.951              | 0.536 |
| 0.15                                           | -0.0033 | 0.128 | 0.935             | 0.492 | 0.933           | 0.490 | 0.933              | 0.490 |
| 0.20                                           | 0.0246  | 0.123 | 0.944             | 0.477 | 0.947           | 0.475 | 0.947              | 0.475 |
| 0.25                                           | 0.0054  | 0.123 | 0.944             | 0.480 | 0.945           | 0.478 | 0.945              | 0.478 |
| 0.30                                           | 0.0041  | 0.123 | 0.952             | 0.491 | 0.953           | 0.489 | 0.953              | 0.489 |
| 0.35                                           | -0.0195 | 0.135 | 0.940             | 0.512 | 0.940           | 0.510 | 0.940              | 0.510 |
| 0.40                                           | 0.0297  | 0.135 | 0.954             | 0.540 | 0.955           | 0.537 | 0.955              | 0.537 |
| 0.45                                           | 0.0028  | 0.145 | 0.951             | 0.578 | 0.948           | 0.574 | 0.948              | 0.574 |
| 0.50                                           | 0.0109  | 0.161 | 0.945             | 0.625 | 0.945           | 0.620 | 0.945              | 0.621 |

Table S8. The empirical biases, sMSE, CP and IL for  $\beta_1 = 0.5$  under the dominant model.

| MAF                                            | Bias    | sMSE  | CP                | IL    | CP              | IL    | CP                 | IL    |
|------------------------------------------------|---------|-------|-------------------|-------|-----------------|-------|--------------------|-------|
|                                                |         |       | Standard Interval |       | Wilson Interval |       | Log-Delta Interval |       |
| For inferring $\lambda_1 (= \lambda_2 = 3.58)$ |         |       |                   |       |                 |       |                    |       |
| 0.10                                           | 0.0256  | 0.244 | 0.956             | 1.000 | 0.957           | 0.991 | 0.957              | 0.991 |
| 0.15                                           | 0.0440  | 0.243 | 0.943             | 0.952 | 0.947           | 0.944 | 0.947              | 0.945 |
| 0.20                                           | -0.0276 | 0.240 | 0.948             | 0.952 | 0.946           | 0.944 | 0.946              | 0.945 |
| 0.25                                           | -0.0042 | 0.248 | 0.948             | 0.979 | 0.946           | 0.970 | 0.946              | 0.971 |
| 0.30                                           | 0.0434  | 0.262 | 0.943             | 1.020 | 0.947           | 1.010 | 0.947              | 1.011 |
| 0.35                                           | 0.0223  | 0.269 | 0.952             | 1.083 | 0.952           | 1.071 | 0.952              | 1.072 |
| 0.40                                           | 0.0179  | 0.294 | 0.943             | 1.152 | 0.947           | 1.138 | 0.947              | 1.139 |
| 0.45                                           | -0.0165 | 0.321 | 0.940             | 1.248 | 0.937           | 1.230 | 0.937              | 1.232 |
| 0.50                                           | 0.0489  | 0.343 | 0.952             | 1.373 | 0.952           | 1.349 | 0.952              | 1.351 |

### 3. Additional simulation results for sample size $n = 1000$ and $n = 500$ .

Consider the linear model  $Y = \beta_0 + G\beta_1 + \epsilon$ , where  $Y = (y_1, y_2, \dots, y_n)^\tau$  denotes the trait value,  $G = (g_1, g_2, \dots, g_n)^\tau$  denotes the genotype value at a single nucleotide polymorphism (SNP) locus with  $g_i \in \{0, 1, 2\}$  being the count of a certain allele, and  $\epsilon = (\epsilon_1, \epsilon_2, \dots, \epsilon_n)^\tau$  denotes the random error with  $\epsilon_i$  *i.i.d.* following a truncated generalized extreme value distribution (a heavy-tailed distribution),  $tGEV(0, 0, 1, 0)$  with the shape parameter 0, the location parameter 0, the scale parameter 1 and the truncated point 0. We consider  $\beta_0 = 0.5$ ,  $\beta_1 \in \{0, 0.5\}$  and four minor allele frequencies (MAFs) with 0.05, 0.15, 0.30 and 0.45. In Table S9 and S10, we report the empirical type I error rates for the sample size  $n = 1000$  and  $n = 500$ , respectively. They show that the proposed tests can control the type I error rates. KLH is too optimistic. Figure S1 shows the empirical power results of the Kruskal-Wallis test (KW-R, KW-A, KW-D), F test (F-R, F-A, F-D), the Jonckheere-Terpstra test (JT-R, JT-A, JT-D), and the proposed nonparametric test ( $Z_R, Z_A, Z_D$ ). It indicates that the proposed test ( $Z_R, Z_A, Z_D$ ) is more powerful than the other existing tests under the specific genetic model. The power results of KW-A, F-A,  $Z_A$  and MAX3 are shown in Figure S2. Under the additive and dominant models with MAF being large, MAX3 is more powerful than KW-A, F-A and  $Z_A$ . Under the additive model, the  $Z_A$  performs the best among them since the data are generated under it. Overall MAX3 is the most robust among them.

Table S9. The empirical type I error rates of the Kruskal-Wallis test (KW-R, KW-A, KW-D), the F test (F-R, F-A, F-D), the Jonckheere-Terpstra test (JT-R, JT-A, JT-D), the KLH and the proposed test ( $Z_R, Z_A, Z_D$ ) and the proposed MAX3. The nominal level is 0.05 and 2,000 replicates are conducted. (the sample size is 1000).

| MAF  | KW-R  | KW-A  | KW-D  | F-R   | F-A   | F-D   | JT-R  | JT-A  | JT-D  | KLH   | $Z_R$ | $Z_A$ | $Z_D$ | MAX3  |
|------|-------|-------|-------|-------|-------|-------|-------|-------|-------|-------|-------|-------|-------|-------|
| 0.05 | 0.040 | 0.041 | 0.048 | 0.050 | 0.051 | 0.047 | 0.037 | 0.041 | 0.044 | 0.213 | 0.007 | 0.049 | 0.048 | 0.024 |
| 0.15 | 0.051 | 0.047 | 0.053 | 0.043 | 0.050 | 0.046 | 0.045 | 0.035 | 0.043 | 0.060 | 0.046 | 0.046 | 0.050 | 0.044 |
| 0.30 | 0.053 | 0.055 | 0.045 | 0.051 | 0.054 | 0.052 | 0.040 | 0.041 | 0.033 | 0.051 | 0.050 | 0.049 | 0.042 | 0.049 |
| 0.45 | 0.043 | 0.049 | 0.058 | 0.049 | 0.058 | 0.059 | 0.041 | 0.046 | 0.048 | 0.056 | 0.042 | 0.056 | 0.056 | 0.052 |

14

Table S10. The empirical type I error rates of the Kruskal-Wallis test (KW-R, KW-A, KW-D), the F test (F-R, F-A, F-D), the Jonckheere-Terpstra test (JT-R, JT-A, JT-D), the KLH and the proposed test ( $Z_R, Z_A, Z_D$ ) and the proposed MAX3. The nominal level is 0.05 and 2,000 replicates are conducted. (the sample size is 500).

| MAF  | KW-R  | KW-A  | KW-D  | F-R   | F-A   | F-D   | JT-R  | JT-A  | JT-D  | KLH   | $Z_R$ | $Z_A$ | $Z_D$ | MAX3  |
|------|-------|-------|-------|-------|-------|-------|-------|-------|-------|-------|-------|-------|-------|-------|
| 0.05 | 0.029 | 0.020 | 0.036 | 0.031 | 0.029 | 0.029 | 0.026 | 0.029 | 0.030 | 0.196 | 5e-04 | 0.037 | 0.035 | 0.018 |
| 0.15 | 0.049 | 0.048 | 0.048 | 0.047 | 0.049 | 0.047 | 0.042 | 0.040 | 0.031 | 0.085 | 0.041 | 0.043 | 0.046 | 0.037 |
| 0.30 | 0.048 | 0.044 | 0.052 | 0.049 | 0.051 | 0.050 | 0.039 | 0.040 | 0.039 | 0.054 | 0.048 | 0.042 | 0.047 | 0.040 |
| 0.45 | 0.057 | 0.058 | 0.043 | 0.053 | 0.050 | 0.047 | 0.042 | 0.037 | 0.034 | 0.051 | 0.052 | 0.042 | 0.042 | 0.046 |

Figure S1. The empirical powers of the Kruskal-Wallis test, the F test, the Jonckheere-Terpstra test and the proposed test when  $\beta_1 = 0.5$ . The first column is for the sample size  $n = 1000$  and the second column is for  $n = 500$ .

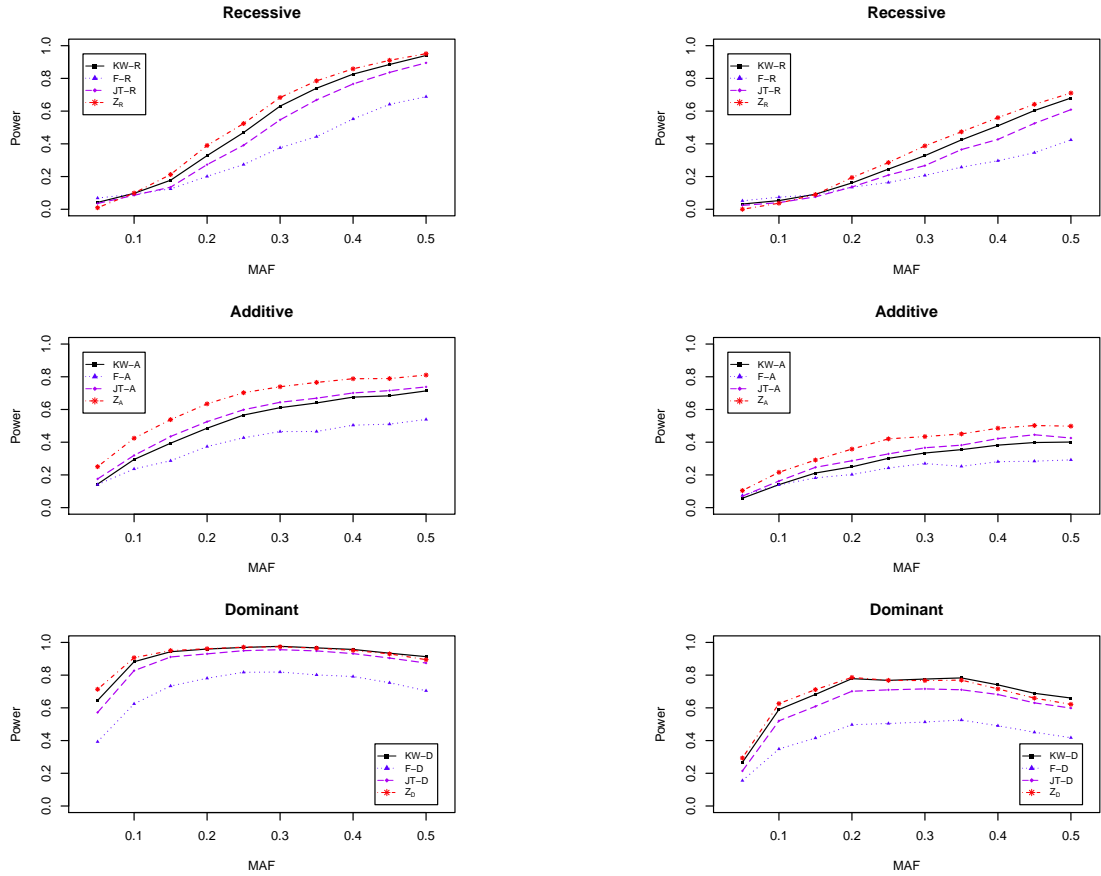

Figure S2. The empirical powers of KW-A, F-A,  $Z_A$  and MAX3 when  $\beta_1 = 0.5$ . The first column is for the sample size  $n = 1000$  and the second column is for  $n = 500$ .

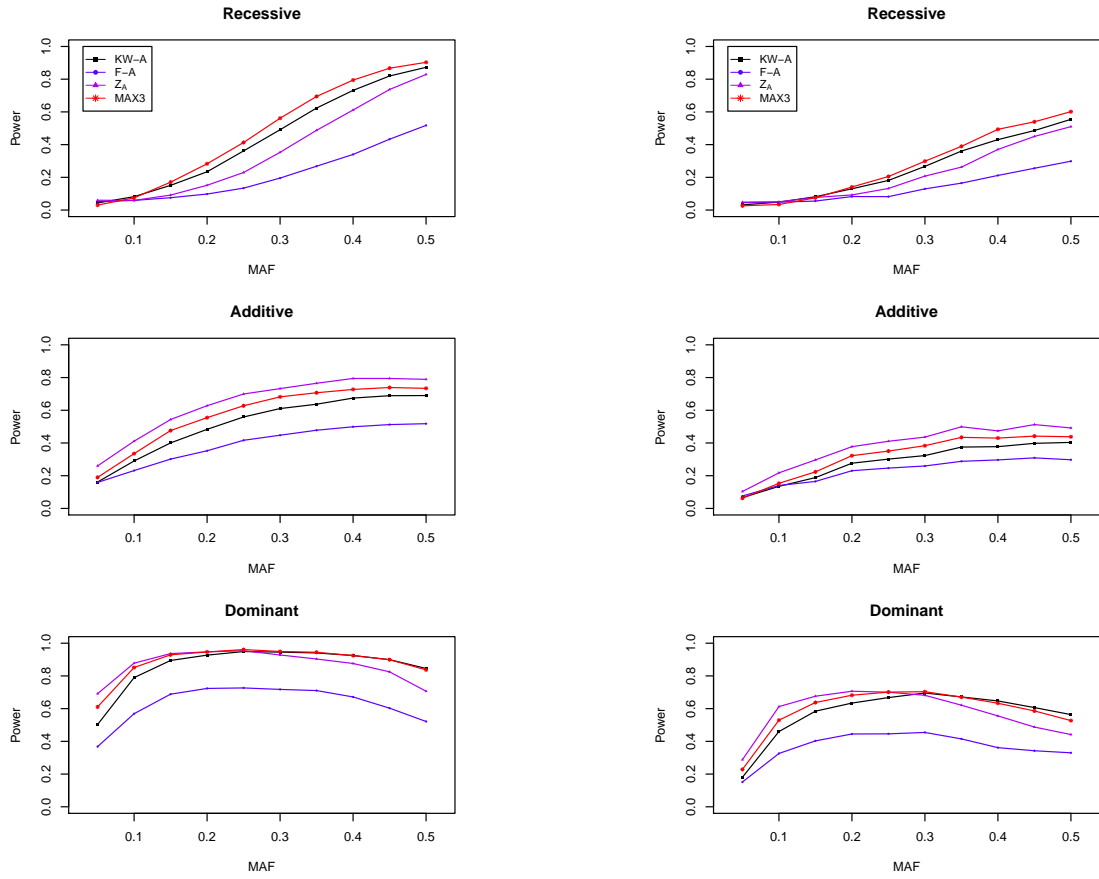



#### 4. Estimation procedures considering the covariates.

Adjusting for the effects of covariates is commonly come across in population-based genetic association studies. For example, the potential population structure, a very important confounder factor usually leads to many false positive findings. So adjusting for population stratification has become a routine when doing the association analysis. Suppose that  $X$  is  $n \times p$  matrix for a  $p$ -dimensional covariate. Using the notations in the main text, we first make the orthogonal projection of  $y$  ( $\hat{=}(y_1, y_2, \dots, y_n)^T$ ) on  $X$ . Denote the residual by  $\tilde{\epsilon}$  ( $\hat{=}(\tilde{\epsilon}_1, \tilde{\epsilon}_2, \dots, \tilde{\epsilon}_n)^T$ ), where  $\tilde{\epsilon} = y - X(X^T X)^{-1} X^T y$ . Then we substitute  $y_i$  by  $\tilde{\epsilon}_i$  and conduct the point and confidence interval estimation procedures as in the main text.

#### 5. Simulation studies considering the covariates.

##### Simulation designs

Consider the linear model  $Y = \beta_0 + X\gamma + G\beta_1 + \epsilon$ , where  $X$  follow the standard normal  $N(0, 1)$ . Let  $\beta_0 = 0.5$  and  $\beta_1 \in \{0.25, 0.5\}$ . 10 MAFs with 0.05, 0.10, 0.15, 0.20, 0.25, 0.30, 0.35, 0.40, 0.45, 0.50 are considered. The sample size is fixed to be 1,500 and 2,000 replicates are conducted to calculate the empirical biases, sMSEs, CPs and ILs for each scenario.

##### Tables

1) Tables S11 and S12 shows the empirical results of the point and confidence interval estimation of  $\lambda_1$  and  $\lambda_2$  for  $\beta_1 = 0.25$  and  $\beta_1 = 0.5$ , respectively.

2) Tables S13 and S14 shows the empirical results of the point and confidence interval estimation of  $\lambda_{2R}$  for  $\beta_1 = 0.25$  and  $\beta_1 = 0.5$ , respectively under the recessive model.

3) Tables S15 and S16 shows the empirical results of the point and confidence interval estimation of  $\lambda_{1A}$  for  $\beta_1 = 0.25$  and  $\beta_1 = 0.5$ , respectively, under the additive model.

4) Tables S17 and S18 shows the empirical results of the point and confidence interval estimation of  $\lambda_{1D}$  for  $\beta_1 = 0.25$  and  $\beta_1 = 0.5$ , respectively, under the dominant model.

##### Results

Similar phenomena are observed to those without considering the covariates. The sMSE is decreasing with the increasing of the MAF overall. The three interval estimation methods behave well and keep the CPs correctly when the MAF is large. When the MAF is small, the performances of the above three confidence interval procedures are a little bit optimistic to infer  $\lambda_2$  with the empirical CPs being less than 95%. The reason is that the number of subjects with genotype 2 is very small and the asymptotic statistical property does not hold. The Wilson Interval and the Log-Delta Interval have almost the same performances. Overall the Log-Delta and the Wilson method have larger CP and shorter IL than the Standard Interval.

Table S11. The empirical biases, sMSE, CP and IL for  $\beta_1 = 0.25$ .

| MAF                                | Bias    | sMSE  | CP                | IL    | CP              | IL    | CP                 | IL    |
|------------------------------------|---------|-------|-------------------|-------|-----------------|-------|--------------------|-------|
|                                    |         |       | Standard Interval |       | Wilson Interval |       | Log-Delta Interval |       |
| For inferring $\lambda_1 (= 1.43)$ |         |       |                   |       |                 |       |                    |       |
| 0.10                               | -0.0130 | 0.107 | 0.936             | 0.407 | 0.936           | 0.406 | 0.936              | 0.406 |
| 0.15                               | -0.0109 | 0.093 | 0.948             | 0.368 | 0.948           | 0.367 | 0.948              | 0.367 |
| 0.20                               | 0.0028  | 0.089 | 0.948             | 0.352 | 0.947           | 0.351 | 0.947              | 0.351 |
| 0.25                               | -0.0115 | 0.087 | 0.952             | 0.349 | 0.951           | 0.348 | 0.951              | 0.348 |
| 0.30                               | 0.0181  | 0.092 | 0.942             | 0.354 | 0.942           | 0.353 | 0.942              | 0.353 |
| 0.35                               | 0.0060  | 0.092 | 0.948             | 0.363 | 0.948           | 0.362 | 0.949              | 0.362 |
| 0.40                               | -0.0055 | 0.097 | 0.947             | 0.380 | 0.949           | 0.378 | 0.949              | 0.379 |
| 0.45                               | 0.0165  | 0.104 | 0.948             | 0.405 | 0.947           | 0.403 | 0.947              | 0.403 |
| 0.50                               | 0.0020  | 0.110 | 0.946             | 0.433 | 0.946           | 0.431 | 0.946              | 0.431 |
| For inferring $\lambda_2 (= 1.97)$ |         |       |                   |       |                 |       |                    |       |
| 0.10                               | 0.0583  | 0.568 | 0.914             | 2.242 | 0.918           | 2.018 | 0.920              | 2.042 |
| 0.15                               | 0.0384  | 0.352 | 0.944             | 1.386 | 0.947           | 1.333 | 0.949              | 1.340 |
| 0.20                               | -0.0053 | 0.259 | 0.949             | 1.037 | 0.950           | 1.014 | 0.951              | 1.017 |
| 0.25                               | 0.0216  | 0.211 | 0.957             | 0.857 | 0.956           | 0.844 | 0.958              | 0.846 |
| 0.30                               | 0.0041  | 0.189 | 0.948             | 0.761 | 0.949           | 0.752 | 0.950              | 0.753 |
| 0.35                               | 0.0341  | 0.177 | 0.952             | 0.705 | 0.955           | 0.698 | 0.955              | 0.699 |
| 0.40                               | -0.0025 | 0.170 | 0.949             | 0.676 | 0.952           | 0.670 | 0.952              | 0.671 |
| 0.45                               | 0.0175  | 0.171 | 0.952             | 0.679 | 0.949           | 0.673 | 0.949              | 0.674 |
| 0.50                               | 0.0251  | 0.178 | 0.949             | 0.697 | 0.952           | 0.690 | 0.952              | 0.691 |

Table S12. The empirical biases, sMSE, CP and IL for  $\beta_1 = 0.5$ .

| MAF                                | Bias    | sMSE  | CP                | IL    | CP              | IL    | CP                 | IL    |
|------------------------------------|---------|-------|-------------------|-------|-----------------|-------|--------------------|-------|
|                                    |         |       | Standard Interval |       | Wilson Interval |       | Log-Delta Interval |       |
| For inferring $\lambda_1 (= 1.97)$ |         |       |                   |       |                 |       |                    |       |
| 0.10                               | 0.0018  | 0.137 | 0.953             | 0.546 | 0.953           | 0.543 | 0.953              | 0.543 |
| 0.15                               | -0.0072 | 0.129 | 0.944             | 0.503 | 0.945           | 0.501 | 0.945              | 0.501 |
| 0.20                               | -0.0171 | 0.126 | 0.943             | 0.490 | 0.943           | 0.488 | 0.944              | 0.488 |
| 0.25                               | -0.0126 | 0.128 | 0.935             | 0.493 | 0.935           | 0.491 | 0.935              | 0.491 |
| 0.30                               | 0.0021  | 0.130 | 0.948             | 0.504 | 0.950           | 0.502 | 0.950              | 0.502 |
| 0.35                               | 0.0119  | 0.137 | 0.934             | 0.525 | 0.936           | 0.522 | 0.936              | 0.523 |
| 0.40                               | 0.0289  | 0.141 | 0.954             | 0.556 | 0.955           | 0.552 | 0.955              | 0.553 |
| 0.45                               | -0.0004 | 0.149 | 0.950             | 0.593 | 0.951           | 0.589 | 0.951              | 0.590 |
| 0.50                               | 0.0006  | 0.162 | 0.951             | 0.643 | 0.951           | 0.637 | 0.951              | 0.638 |
| For inferring $\lambda_2 (= 3.58)$ |         |       |                   |       |                 |       |                    |       |
| 0.10                               | 0.1578  | 0.918 | 0.924             | 3.789 | 0.932           | 3.329 | 0.933              | 3.361 |
| 0.15                               | 0.1019  | 0.562 | 0.942             | 2.302 | 0.946           | 2.193 | 0.946              | 2.202 |
| 0.20                               | 0.0341  | 0.455 | 0.939             | 1.774 | 0.942           | 1.723 | 0.942              | 1.727 |
| 0.25                               | 0.0913  | 0.401 | 0.941             | 1.516 | 0.945           | 1.484 | 0.946              | 1.487 |
| 0.30                               | 0.0377  | 0.356 | 0.945             | 1.388 | 0.949           | 1.363 | 0.949              | 1.365 |
| 0.35                               | 0.0097  | 0.337 | 0.950             | 1.334 | 0.950           | 1.312 | 0.950              | 1.314 |
| 0.40                               | -0.0105 | 0.338 | 0.949             | 1.340 | 0.944           | 1.318 | 0.945              | 1.320 |
| 0.45                               | 0.0229  | 0.346 | 0.947             | 1.376 | 0.953           | 1.352 | 0.954              | 1.354 |
| 0.50                               | 0.0817  | 0.375 | 0.944             | 1.461 | 0.949           | 1.433 | 0.949              | 1.435 |

Table S13. The empirical biases, sMSE, CP and IL for  $\beta_1 = 0.25$  under the recessive model.

| MAF  | Bias    | sMSE  | CP                                 | IL    | CP              | IL    | CP                 | IL    |
|------|---------|-------|------------------------------------|-------|-----------------|-------|--------------------|-------|
|      |         |       | Standard Interval                  |       | Wilson Interval |       | Log-Delta Interval |       |
|      |         |       | For inferring $\lambda_2 (= 1.97)$ |       |                 |       |                    |       |
| 0.10 | 0.0834  | 0.562 | 0.915                              | 2.282 | 0.923           | 2.046 | 0.926              | 2.070 |
| 0.15 | 0.0470  | 0.352 | 0.941                              | 1.381 | 0.942           | 1.328 | 0.943              | 1.334 |
| 0.20 | 0.0371  | 0.262 | 0.942                              | 1.016 | 0.946           | 0.995 | 0.947              | 0.998 |
| 0.25 | 0.0136  | 0.216 | 0.939                              | 0.822 | 0.938           | 0.811 | 0.939              | 0.812 |
| 0.30 | -0.0067 | 0.179 | 0.943                              | 0.699 | 0.941           | 0.693 | 0.942              | 0.693 |
| 0.35 | 0.0077  | 0.157 | 0.954                              | 0.619 | 0.953           | 0.615 | 0.953              | 0.615 |
| 0.40 | -0.0026 | 0.145 | 0.945                              | 0.566 | 0.946           | 0.563 | 0.946              | 0.563 |
| 0.45 | 0.0328  | 0.138 | 0.938                              | 0.526 | 0.939           | 0.523 | 0.939              | 0.524 |
| 0.50 | 0.0156  | 0.126 | 0.956                              | 0.502 | 0.956           | 0.500 | 0.956              | 0.500 |

Table S14. The empirical biases, sMSE, CP and IL for  $\beta_1 = 0.5$  under the recessive model.

| MAF  | Bias    | sMSE  | CP                                 | IL    | CP              | IL    | CP                 | IL    |
|------|---------|-------|------------------------------------|-------|-----------------|-------|--------------------|-------|
|      |         |       | Standard Interval                  |       | Wilson Interval |       | Log-Delta Interval |       |
|      |         |       | For inferring $\lambda_2 (= 3.58)$ |       |                 |       |                    |       |
| 0.10 | 0.1637  | 0.917 | 0.924                              | 3.678 | 0.934           | 3.300 | 0.935              | 3.332 |
| 0.15 | 0.0779  | 0.565 | 0.931                              | 2.245 | 0.937           | 2.142 | 0.937              | 2.151 |
| 0.20 | 0.0565  | 0.430 | 0.933                              | 1.696 | 0.937           | 1.651 | 0.937              | 1.655 |
| 0.25 | 0.0210  | 0.360 | 0.942                              | 1.401 | 0.941           | 1.376 | 0.941              | 1.378 |
| 0.30 | -0.0302 | 0.308 | 0.952                              | 1.232 | 0.948           | 1.215 | 0.948              | 1.217 |
| 0.35 | -0.0228 | 0.275 | 0.953                              | 1.108 | 0.951           | 1.095 | 0.951              | 1.096 |
| 0.40 | 0.0027  | 0.265 | 0.948                              | 1.034 | 0.946           | 1.023 | 0.946              | 1.024 |
| 0.45 | 0.0100  | 0.248 | 0.945                              | 0.986 | 0.947           | 0.977 | 0.948              | 0.977 |
| 0.50 | 0.0298  | 0.241 | 0.954                              | 0.960 | 0.955           | 0.951 | 0.955              | 0.952 |

Table S15. The empirical biases, sMSE, CP and IL for  $\beta_1 = 0.25$  under the additive model.

| MAF                                | Bias    | sMSE  | CP                | IL    | CP              | IL    | CP                 | IL    |
|------------------------------------|---------|-------|-------------------|-------|-----------------|-------|--------------------|-------|
|                                    |         |       | Standard Interval |       | Wilson Interval |       | Log-Delta Interval |       |
| For inferring $\lambda_1 (= 1.43)$ |         |       |                   |       |                 |       |                    |       |
| 0.10                               | -0.0013 | 0.093 | 0.935             | 0.357 | 0.939           | 0.356 | 0.939              | 0.356 |
| 0.15                               | 0.0138  | 0.082 | 0.942             | 0.307 | 0.943           | 0.306 | 0.944              | 0.306 |
| 0.20                               | -0.0039 | 0.071 | 0.949             | 0.278 | 0.948           | 0.277 | 0.948              | 0.277 |
| 0.25                               | -0.0146 | 0.069 | 0.937             | 0.260 | 0.937           | 0.259 | 0.937              | 0.259 |
| 0.30                               | -0.0089 | 0.063 | 0.948             | 0.249 | 0.947           | 0.248 | 0.947              | 0.248 |
| 0.35                               | -0.0025 | 0.062 | 0.943             | 0.243 | 0.944           | 0.242 | 0.944              | 0.242 |
| 0.40                               | 0.0122  | 0.063 | 0.937             | 0.240 | 0.938           | 0.239 | 0.939              | 0.239 |
| 0.45                               | -0.0058 | 0.061 | 0.949             | 0.238 | 0.948           | 0.238 | 0.948              | 0.238 |
| 0.50                               | 0.0094  | 0.062 | 0.949             | 0.240 | 0.950           | 0.240 | 0.950              | 0.240 |
| For inferring $\lambda_2 (= 1.97)$ |         |       |                   |       |                 |       |                    |       |
| 0.10                               | 0.0944  | 0.602 | 0.925             | 2.330 | 0.925           | 2.063 | 0.927              | 2.089 |
| 0.15                               | 0.0268  | 0.351 | 0.937             | 1.396 | 0.938           | 1.342 | 0.939              | 1.349 |
| 0.20                               | 0.0214  | 0.258 | 0.948             | 1.040 | 0.947           | 1.017 | 0.948              | 1.020 |
| 0.25                               | 0.0006  | 0.213 | 0.946             | 0.858 | 0.949           | 0.845 | 0.949              | 0.847 |
| 0.30                               | -0.0130 | 0.190 | 0.947             | 0.756 | 0.949           | 0.747 | 0.949              | 0.748 |
| 0.35                               | 0.0181  | 0.176 | 0.947             | 0.703 | 0.950           | 0.696 | 0.950              | 0.696 |
| 0.40                               | 0.0260  | 0.176 | 0.942             | 0.682 | 0.944           | 0.676 | 0.945              | 0.677 |
| 0.45                               | -0.0045 | 0.170 | 0.948             | 0.677 | 0.949           | 0.670 | 0.949              | 0.671 |
| 0.50                               | 0.0165  | 0.179 | 0.944             | 0.699 | 0.947           | 0.692 | 0.947              | 0.693 |

Table S16. The empirical biases, sMSE, CP and IL for  $\beta_1 = 0.5$  under the additive model.

| MAF                                | Bias    | sMSE  | CP                | IL    | CP              | IL    | CP                 | IL    |
|------------------------------------|---------|-------|-------------------|-------|-----------------|-------|--------------------|-------|
|                                    |         |       | Standard Interval |       | Wilson Interval |       | Log-Delta Interval |       |
| For inferring $\lambda_1 (= 1.97)$ |         |       |                   |       |                 |       |                    |       |
| 0.10                               | -0.0420 | 0.129 | 0.929             | 0.474 | 0.926           | 0.472 | 0.926              | 0.472 |
| 0.15                               | 0.0148  | 0.106 | 0.944             | 0.412 | 0.947           | 0.410 | 0.947              | 0.410 |
| 0.20                               | -0.0184 | 0.100 | 0.940             | 0.379 | 0.941           | 0.378 | 0.941              | 0.378 |
| 0.25                               | -0.0038 | 0.092 | 0.942             | 0.361 | 0.941           | 0.360 | 0.941              | 0.360 |
| 0.30                               | 0.0370  | 0.094 | 0.937             | 0.350 | 0.939           | 0.349 | 0.940              | 0.349 |
| 0.35                               | 0.0065  | 0.086 | 0.953             | 0.344 | 0.954           | 0.344 | 0.954              | 0.344 |
| 0.40                               | -0.0024 | 0.090 | 0.936             | 0.342 | 0.937           | 0.342 | 0.937              | 0.342 |
| 0.45                               | -0.0004 | 0.085 | 0.951             | 0.346 | 0.952           | 0.345 | 0.952              | 0.345 |
| 0.50                               | -0.0075 | 0.091 | 0.936             | 0.350 | 0.933           | 0.349 | 0.933              | 0.349 |
| For inferring $\lambda_2 (= 3.58)$ |         |       |                   |       |                 |       |                    |       |
| 0.10                               | 0.1061  | 0.942 | 0.924             | 3.797 | 0.925           | 3.330 | 0.927              | 3.362 |
| 0.15                               | 0.0266  | 0.557 | 0.940             | 2.284 | 0.943           | 2.176 | 0.943              | 2.185 |
| 0.20                               | 0.0542  | 0.454 | 0.940             | 1.768 | 0.941           | 1.718 | 0.943              | 1.722 |
| 0.25                               | 0.0206  | 0.377 | 0.947             | 1.511 | 0.947           | 1.479 | 0.947              | 1.482 |
| 0.30                               | 0.0519  | 0.348 | 0.953             | 1.391 | 0.959           | 1.366 | 0.959              | 1.368 |
| 0.35                               | -0.0056 | 0.326 | 0.955             | 1.333 | 0.954           | 1.311 | 0.954              | 1.313 |
| 0.40                               | 0.0088  | 0.343 | 0.932             | 1.327 | 0.935           | 1.305 | 0.935              | 1.307 |
| 0.45                               | -0.0149 | 0.329 | 0.959             | 1.375 | 0.955           | 1.351 | 0.955              | 1.353 |
| 0.50                               | 0.0161  | 0.364 | 0.949             | 1.445 | 0.943           | 1.417 | 0.944              | 1.419 |

Table S17. The empirical biases, sMSE, CP and IL for  $\beta_1 = 0.25$  under the dominant model.

| MAF                                            | Bias    | sMSE  | CP                | IL    | CP              | IL    | CP                 | IL    |
|------------------------------------------------|---------|-------|-------------------|-------|-----------------|-------|--------------------|-------|
|                                                |         |       | Standard Interval |       | Wilson Interval |       | Log-Delta Interval |       |
| For inferring $\lambda_1 (= \lambda_2 = 1.97)$ |         |       |                   |       |                 |       |                    |       |
| 0.10                                           | 0.0424  | 0.143 | 0.940             | 0.538 | 0.944           | 0.534 | 0.944              | 0.535 |
| 0.15                                           | 0.0049  | 0.124 | 0.953             | 0.491 | 0.953           | 0.489 | 0.953              | 0.489 |
| 0.20                                           | -0.0106 | 0.123 | 0.947             | 0.478 | 0.947           | 0.476 | 0.948              | 0.476 |
| 0.25                                           | -0.0307 | 0.126 | 0.947             | 0.479 | 0.943           | 0.477 | 0.943              | 0.477 |
| 0.30                                           | -0.0145 | 0.125 | 0.944             | 0.490 | 0.944           | 0.487 | 0.944              | 0.488 |
| 0.35                                           | 0.0130  | 0.133 | 0.941             | 0.510 | 0.942           | 0.507 | 0.943              | 0.508 |
| 0.40                                           | -0.0369 | 0.141 | 0.943             | 0.538 | 0.939           | 0.535 | 0.939              | 0.535 |
| 0.45                                           | 0.0020  | 0.146 | 0.949             | 0.573 | 0.950           | 0.569 | 0.950              | 0.570 |
| 0.50                                           | 0.0008  | 0.162 | 0.944             | 0.623 | 0.947           | 0.618 | 0.947              | 0.619 |

Table S18. The empirical biases, sMSE, CP and IL for  $\beta_1 = 0.5$  under the dominant model.

| MAF                                            | Bias    | sMSE  | CP                | IL    | CP              | IL    | CP                 | IL    |
|------------------------------------------------|---------|-------|-------------------|-------|-----------------|-------|--------------------|-------|
|                                                |         |       | Standard Interval |       | Wilson Interval |       | Log-Delta Interval |       |
| For inferring $\lambda_1 (= \lambda_2 = 3.58)$ |         |       |                   |       |                 |       |                    |       |
| 0.10                                           | -0.0286 | 0.250 | 0.951             | 0.999 | 0.947           | 0.989 | 0.947              | 0.990 |
| 0.15                                           | 0.0438  | 0.248 | 0.943             | 0.953 | 0.944           | 0.945 | 0.944              | 0.945 |
| 0.20                                           | 0.0088  | 0.242 | 0.946             | 0.952 | 0.945           | 0.944 | 0.945              | 0.945 |
| 0.25                                           | 0.0437  | 0.247 | 0.948             | 0.974 | 0.952           | 0.966 | 0.952              | 0.966 |
| 0.30                                           | 0.0077  | 0.263 | 0.946             | 1.017 | 0.946           | 1.007 | 0.946              | 1.008 |
| 0.35                                           | 0.0115  | 0.273 | 0.951             | 1.071 | 0.949           | 1.060 | 0.949              | 1.061 |
| 0.40                                           | -0.0132 | 0.291 | 0.943             | 1.148 | 0.941           | 1.134 | 0.941              | 1.135 |
| 0.45                                           | -0.0010 | 0.310 | 0.952             | 1.248 | 0.951           | 1.230 | 0.951              | 1.231 |
| 0.50                                           | 0.0269  | 0.352 | 0.942             | 1.353 | 0.944           | 1.330 | 0.945              | 1.332 |



## **6. The empirical type I error rates under the nominal significance level of 0.0005.**

We consider the same settings as Table 3 in the main text except for the nominal significance level. Here we compare the type I error rates of all considered procedures including KW (KW-R, KW-A, KW-D), F (F-R, F-A, F-D), JT (JT-R, JT-A, JT-D), KLH, and the proposed test  $(Z_R, Z_A, Z_D)$ , and the proposed MAX3 under the nominal significance level of 0.0005. From Table S19, it can be seen that the proposed test NRT  $(Z_R, Z_A, Z_D)$  can also control the type I error under a relatively stringent nominal significance level.

Table S19. The empirical type I error rates of the Kruskal-Wallis test (KW-R, KW-A, KW-D), the F test (F-R, F-A, F-D), the Jonckheere-Terpstra test (JT-R, JT-A, JT-D), the KLH and the proposed test ( $Z_R, Z_A, Z_D$ ) and the proposed MAX3. The nominal level is  $5 \times 10^{-4}$  and 100,000 replicates are conducted.

| MAF  | KW-R    | KW-A    | KW-D    | F-R     | F-A     | F-D     | JT-R | JT-A | JT-D | KLH     | $Z_R$   | $Z_A$   | $Z_D$   | MAX3    |
|------|---------|---------|---------|---------|---------|---------|------|------|------|---------|---------|---------|---------|---------|
| 0.05 | 0.00003 | 0.00025 | 0.00049 | 0.00466 | 0.00060 | 0.00055 | 0    | 0    | 0    | 0.08314 | 0.00009 | 0.00047 | 0.00038 | 0.00024 |
| 0.15 | 0.00052 | 0.00055 | 0.00046 | 0.00113 | 0.00061 | 0.00056 | 0    | 0    | 0    | 0.00200 | 0.00028 | 0.00046 | 0.00044 | 0.00045 |
| 0.30 | 0.00038 | 0.00042 | 0.00056 | 0.00061 | 0.00055 | 0.00050 | 0    | 0    | 0    | 0.00077 | 0.00030 | 0.00047 | 0.00052 | 0.00045 |
| 0.45 | 0.00058 | 0.00061 | 0.00051 | 0.00056 | 0.00053 | 0.00065 | 0    | 0    | 0    | 0.00075 | 0.00046 | 0.00040 | 0.00045 | 0.00054 |

**7. P-values of KW-A, F-A,  $Z_A$ , and MAX3 for 25 SNPs in the gene PTPN22 and 45 SNPs in the genomic region of 6p21.33.**

**Tables**

1) Tables S20 shows the p-values of testing  $H_0$  for 25 SNPs in the gene PTPN22 conferring risk to the anti-CCP using KW-A, F-A,  $Z_A$ , and MAX3. The *permu* is the permutation method to calculate the statistical significance of MAX3.

2) Tables S21 shows the p-values of testing  $H_0$  for 45 SNPs in the genomic region of 6p21.33 conferring risk to the anti-CCP using KW-A, F-A,  $Z_A$ , and MAX3. The *permu* is the permutation method to calculate the statistical significance of MAX3.

Table S20. The p-values of testing  $H_0$  for 25 SNPs in the gene PTPN22 conferring risk to the anti-CCP.

| snpid      | KW-A   | F-A    | $Z_A$  | MAX3   | <i>permu</i> |
|------------|--------|--------|--------|--------|--------------|
| rs2040041  | 0.9589 | 0.9899 | 0.7888 | 0.9551 | 0.9570       |
| rs12117799 | 0.9431 | 0.8266 | 0.9776 | 0.9672 | 0.9690       |
| rs2797409  | 0.0794 | 0.7691 | 0.5018 | 0.0940 | 0.1120       |
| rs3827733  | 0.5513 | 0.5788 | 0.6147 | 0.4586 | 0.4560       |
| rs3811021  | 0.5070 | 0.9787 | 0.9310 | 0.4936 | 0.4930       |
| rs2476599  | 0.9352 | 0.9079 | 0.7410 | 0.9327 | 0.9220       |
| rs3789607  | 0.5746 | 0.5987 | 0.4623 | 0.5469 | 0.5420       |
| rs2476601  | 0.3752 | 0.5997 | 0.7112 | 0.5788 | 0.6020       |
| rs1217407  | 0.0847 | 0.7744 | 0.5115 | 0.1035 | 0.0940       |
| rs1217418  | 0.1140 | 0.6415 | 0.3568 | 0.1336 | 0.1250       |
| rs6665194  | 0.1883 | 0.7684 | 0.4779 | 0.2283 | 0.2130       |
| rs12566340 | 0.0708 | 0.8846 | 0.6416 | 0.1072 | 0.1030       |
| rs7529353  | 0.0787 | 0.8557 | 0.6000 | 0.1100 | 0.1150       |
| rs2358994  | 0.0116 | 0.3808 | 0.3916 | 0.0182 | 0.0140       |
| rs1217394  | 0.7263 | 0.5121 | 0.4809 | 0.6718 | 0.6760       |
| rs1217392  | 0.0599 | 0.2070 | 0.1920 | 0.0511 | 0.0580       |
| rs10745340 | 0.0573 | 0.2173 | 0.2021 | 0.0489 | 0.0430       |
| rs1217401  | 0.2528 | 0.5313 | 0.6416 | 0.2811 | 0.3070       |
| rs17464525 | 0.5969 | 0.3292 | 0.4362 | 0.5128 | 0.4920       |
| rs971173   | 0.2691 | 0.4795 | 0.5837 | 0.2836 | 0.2720       |
| rs1217390  | 0.7590 | 0.8411 | 0.9552 | 0.8750 | 0.8620       |
| rs878129   | 0.4384 | 0.8673 | 0.7768 | 0.6844 | 0.6760       |
| rs11811771 | 0.0169 | 0.6574 | 0.9772 | 0.1512 | 0.1230       |
| rs11102703 | 0.8298 | 0.7405 | 0.6479 | 0.8075 | 0.8010       |
| rs7545038  | 0.9610 | 0.5425 | 0.7980 | 0.9599 | 0.9630       |

Table S21. The p-values of testing  $H_0$  for 45 SNPs in the genomic region of 6p21.33 conferring risk to the anti-CCP.

| snpid      | KW     | F-A    | $Z_A$  | MAX3   | <i>permu</i> |
|------------|--------|--------|--------|--------|--------------|
| rs2523467  | 0.0856 | 0.1480 | 0.2162 | 0.1194 | 0.1120       |
| rs6940467  | 0.0955 | 0.3216 | 0.4080 | 0.3161 | 0.3500       |
| rs12660382 | 0.1171 | 0.1934 | 0.3016 | 0.2207 | 0.1910       |
| rs2395488  | 0.4095 | 0.6721 | 0.4135 | 0.4116 | 0.4040       |
| rs2248372  | 0.3697 | 0.5921 | 0.4456 | 0.3856 | 0.3860       |
| rs2248373  | 0.5770 | 0.9490 | 0.9282 | 0.7502 | 0.7390       |
| rs2248462  | 0.2231 | 0.3514 | 0.2578 | 0.2329 | 0.2040       |
| rs2516513  | 0.1731 | 0.4460 | 0.3607 | 0.2588 | 0.2600       |
| rs2516424  | 0.3807 | 0.6554 | 0.4134 | 0.3866 | 0.3780       |
| rs2248617  | 0.2046 | 0.6800 | 0.4369 | 0.2905 | 0.2990       |
| rs3828893  | 0.7798 | 0.8243 | 0.9176 | 0.8234 | 0.8870       |
| rs3749946  | 0.9459 | 0.8279 | 0.7306 | 0.9290 | 0.9280       |
| rs3099844  | 0.0072 | 0.0020 | 0.0029 | 0.0054 | 0.0010       |
| rs2905722  | 0.9811 | 0.7983 | 0.8496 | 0.9798 | 0.9820       |
| rs2523647  | 0.3071 | 0.0937 | 0.1757 | 0.3019 | 0.2940       |
| rs2516509  | 0.3130 | 0.4269 | 0.3078 | 0.3160 | 0.3090       |
| rs2523710  | 0.1558 | 0.0665 | 0.1903 | 0.1335 | 0.1430       |
| rs2905747  | 0.8230 | 0.6261 | 0.7525 | 0.8029 | 0.8150       |
| rs2516415  | 0.1799 | 0.8495 | 0.7320 | 0.4414 | 0.4130       |
| rs3130922  | 0.5966 | 0.3907 | 0.3982 | 0.5451 | 0.5320       |
| rs3828903  | 0.6728 | 0.5544 | 0.8029 | 0.6776 | 0.6580       |
| rs3828914  | 0.7357 | 0.6613 | 0.9008 | 0.7627 | 0.7540       |

Table S21. *continued*

| snpid     | KW     | F-A    | $Z_A$  | MAX3   | <i>permu</i> |
|-----------|--------|--------|--------|--------|--------------|
| rs2855812 | 0.1722 | 0.4002 | 0.2765 | 0.2124 | 0.1980       |
| rs3134899 | 0.8547 | 0.8923 | 0.8985 | 0.9263 | 0.9160       |
| rs2844498 | 0.8359 | 0.9456 | 0.7382 | 0.8322 | 0.8240       |
| rs2246618 | 0.0112 | 0.5488 | 0.2134 | 0.0635 | 0.0500       |
| rs2516400 | 0.0323 | 0.5605 | 0.3749 | 0.1273 | 0.1000       |
| rs2516399 | 0.4060 | 0.3258 | 0.2750 | 0.3828 | 0.4210       |
| rs2516398 | 0.1151 | 0.5114 | 0.4601 | 0.2599 | 0.2690       |
| rs2246986 | 0.7166 | 0.7110 | 0.5617 | 0.7516 | 0.8000       |
| rs2844494 | 0.1350 | 0.4653 | 0.4804 | 0.2739 | 0.2690       |
| rs9267444 | 0.0159 | 0.1336 | 0.2130 | 0.0168 | 0.0140       |
| rs3093998 | 0.3870 | 0.5501 | 0.5752 | 0.4703 | 0.4790       |
| rs3130637 | 0.3048 | 0.6483 | 0.6023 | 0.2510 | 0.2590       |
| rs3132454 | 0.0221 | 0.0011 | 0.0074 | 0.0165 | 0.0180       |
| rs3093993 | 0.3048 | 0.6483 | 0.6045 | 0.2506 | 0.2470       |
| rs3095227 | 0.3275 | 0.5598 | 0.5635 | 0.2596 | 0.2600       |
| rs2259435 | 0.3330 | 0.0535 | 0.1688 | 0.3126 | 0.3060       |
| rs3093983 | 0.2557 | 0.3953 | 0.3426 | 0.1661 | 0.1720       |
| rs3130055 | 0.2463 | 0.5310 | 0.5788 | 0.2525 | 0.2730       |
| rs3093978 | 0.2584 | 0.4140 | 0.3603 | 0.1691 | 0.1580       |
| rs2734583 | 0.0004 | 0.0009 | 0.0014 | 0.0008 | 0.0005       |
| rs2071596 | 0.8856 | 0.5367 | 0.6715 | 0.8637 | 0.8520       |
| rs2516393 | 0.2584 | 0.4140 | 0.3587 | 0.1688 | 0.1470       |
| rs2844509 | 0.0977 | 0.0704 | 0.1050 | 0.0862 | 0.0940       |

## 8. Simulation results for the random error term following the normal distribution.

Consider the linear model  $Y = \beta_0 + G\beta_1 + \epsilon$ , where  $Y = (y_1, y_2, \dots, y_n)^\tau$  denotes the trait value,  $G = (g_1, g_2, \dots, g_n)^\tau$  denotes the genotype value at a single nucleotide polymorphism (SNP) locus with  $g_i \in \{0, 1, 2\}$  being the count of a certain allele, and  $\epsilon = (\epsilon_1, \epsilon_2, \dots, \epsilon_n)^\tau$  denotes the random error with  $\epsilon_i$  *i.i.d.* following a normal distribution with the mean  $\mu$  and the standard deviation  $b$ . We consider  $\beta_0 = 0.5$ ,  $\beta_1 \in \{0, \ln 1.2, \ln 1.4\}$ ,  $\text{MAF} \in \{0.05, 0.15, 0.30, 0.45\}$ , and  $\mu = 0, b = 4$ . The nominal significant level is 0.05 and 2,000 replicates are conducted. In Table S22, we report the empirical type I error rates with the sample size  $n = 1500$ . It shows that our proposed test can control the type I error rate. Figure S3 shows the empirical power results of the Kruskal-Wallis test (KW-R, KW-A, KW-D), the F test (F-R, F-A, F-D), the Jonckheere-Terpstra test (JT-R, JT-A, JT-D), and the proposed test ( $Z_R, Z_A, Z_D$ ). It indicates that the F test (F-R, F-A, F-D) is most powerful among them. This is reasonable because F test is constructed based on the assumption of normal error. The power results of KW-A, F-A,  $Z_A$  and MAX3 are shown in Figure S4.

Table S22. The empirical type I error rates of the Kruskal-Wallis test (KW-R, KW-A, KW-D), the F test (F-R, F-A, F-D), the Jonckheere-Terpstra test (JT-R, JT-A, JT-D), the KLH and the proposed test ( $Z_R, Z_A, Z_D$ ) and the proposed MAX3 when the random error term follows the normal distribution.

| MAF  | KW-R  | KW-A  | KW-D  | F-R   | F-A   | F-D   | JT-R  | JT-A  | JT-D  | KLH   | $Z_R$ | $Z_A$ | $Z_D$ | MAX3  |
|------|-------|-------|-------|-------|-------|-------|-------|-------|-------|-------|-------|-------|-------|-------|
| 0.05 | 0.043 | 0.044 | 0.044 | 0.046 | 0.047 | 0.047 | 0.038 | 0.042 | 0.034 | 0.169 | 0.017 | 0.046 | 0.043 | 0.030 |
| 0.15 | 0.048 | 0.051 | 0.050 | 0.053 | 0.051 | 0.052 | 0.041 | 0.039 | 0.039 | 0.058 | 0.048 | 0.051 | 0.050 | 0.047 |
| 0.30 | 0.044 | 0.049 | 0.053 | 0.042 | 0.054 | 0.052 | 0.035 | 0.043 | 0.043 | 0.054 | 0.042 | 0.051 | 0.053 | 0.050 |
| 0.45 | 0.050 | 0.040 | 0.047 | 0.048 | 0.050 | 0.042 | 0.041 | 0.036 | 0.036 | 0.043 | 0.049 | 0.048 | 0.046 | 0.042 |



Figure S3. The empirical powers of the Kruskal-Wallis test, the F test, the Jonckheere-Terpstra test and the proposed tests when the random error term follows the normal distribution. The first column is for  $\beta_1 = \ln 1.2$  and the second column is for  $\beta_1 = \ln 1.4$ .

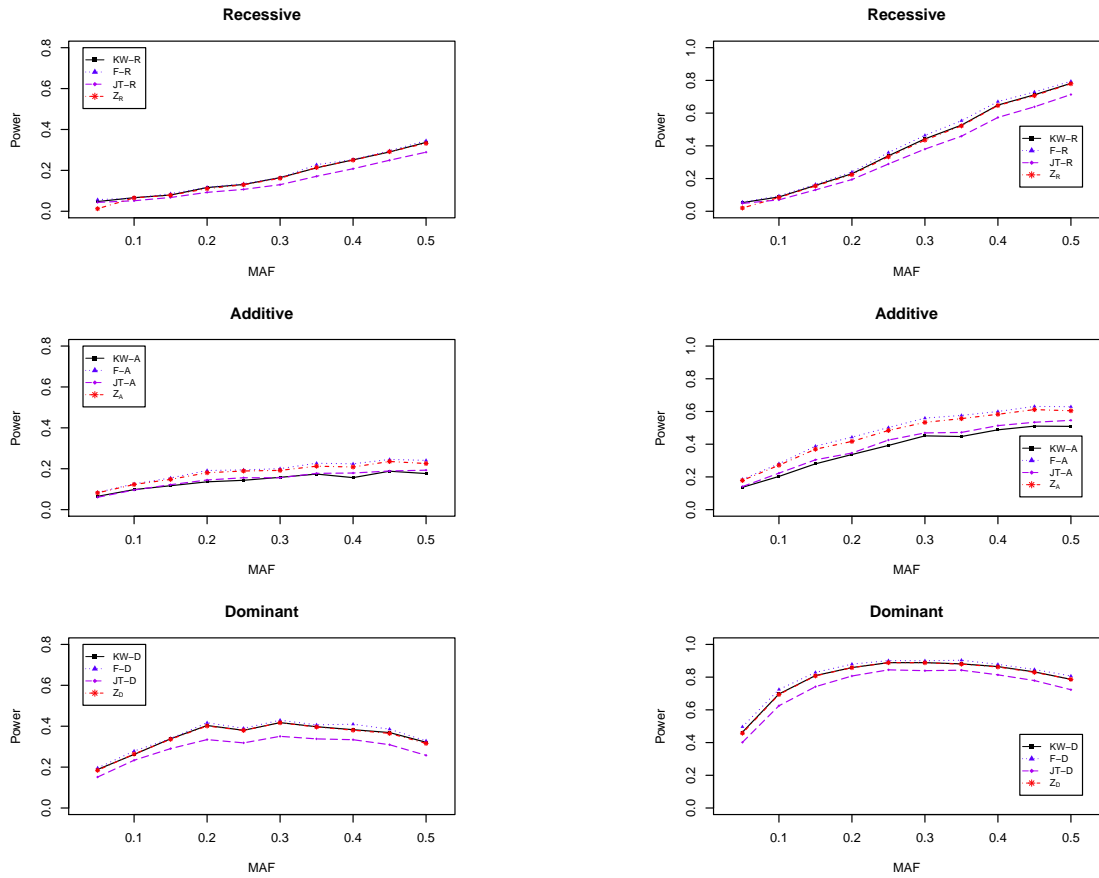

Figure S4. The empirical powers of KW-A, F-A,  $Z_A$  and MAX3 when the random error term follows the normal distribution. The first column is for  $\beta_1 = \ln 1.2$  and the second column is for  $\beta_1 = \ln 1.4$ .

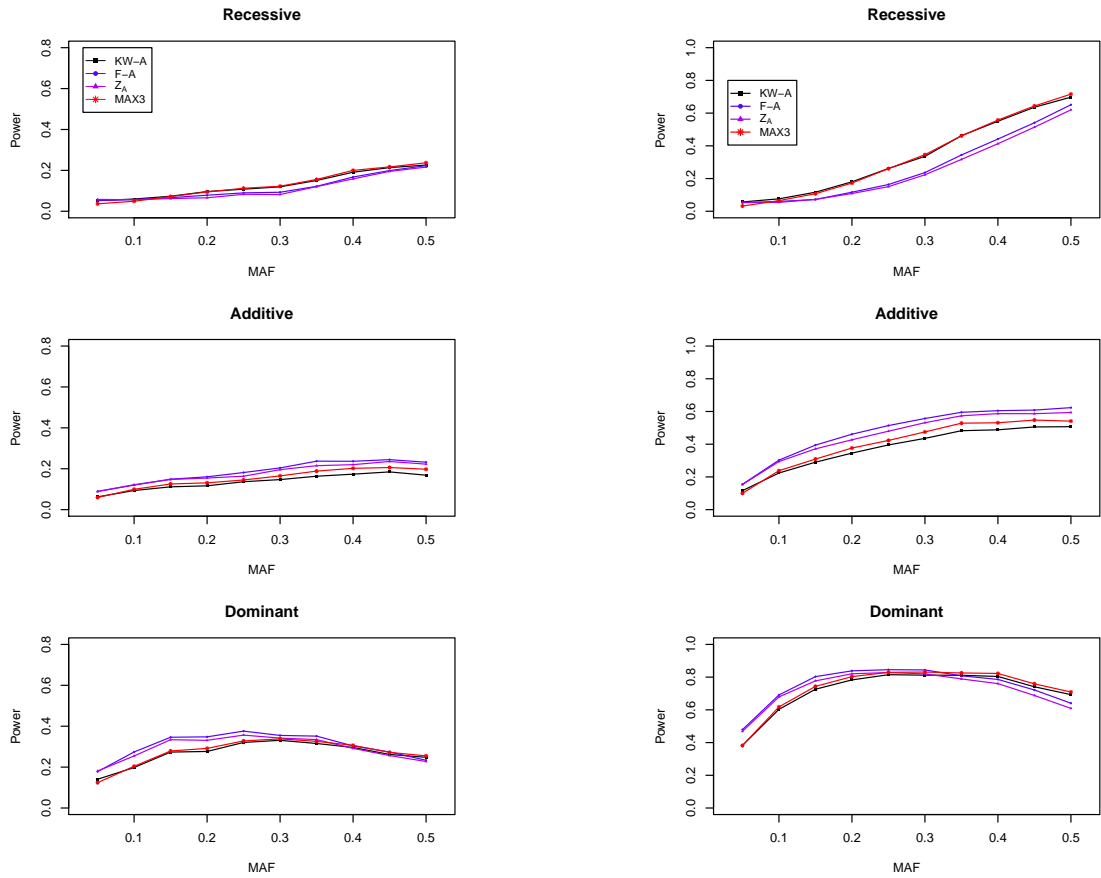

## 9. Simulation results for the random error term following the centralized $t$ -distribution.

Consider the linear model  $Y = \beta_0 + G\beta_1 + a \times \epsilon$ , where  $Y = (y_1, y_2, \dots, y_n)^\tau$  denotes the trait value,  $a$  is a scale parameter,  $G = (g_1, g_2, \dots, g_n)^\tau$  denotes the genotype value at a single nucleotide polymorphism (SNP) locus with  $g_i \in \{0, 1, 2\}$  being the count of a certain allele, and  $\epsilon = (\epsilon_1, \epsilon_2, \dots, \epsilon_n)^\tau$  denotes the random error with  $\epsilon_i$  *i.i.d.* following a  $t$ -distribution with the degree of freedom  $b$ . We consider  $\beta_0 = 0.5$ ,  $\beta_1 \in \{0, \ln 1.2, \ln 1.4\}$ ,  $a = 3$  and  $b = 3$ . The nominal significant level is 0.05 and 2,000 replicates are conducted. In Table S23, we report the empirical type I error rates for the sample size  $n = 1500$ . It shows that our proposed test can control the type I error rate. Figure S5 shows the empirical power results of KW (KW-R, KW-A, KW-D), F (F-R, F-A, F-D), JT (JT-R, JT-A, JT-D), and NRT ( $Z_R, Z_A, Z_D$ ). It indicates that the proposed NRT ( $Z_R, Z_A, Z_D$ ) is more powerful than the other existing test, especially under the additive model. The power results of KW-A, F-A,  $Z_A$  and MAX3 are shown in Figure S6. The results are similar to that of the tGEV error.

Table S23. The empirical type I error rates of the Kruskal-Wallis test (KW-R, KW-A, KW-D), the F test (F-R, F-A, F-D), the Jonckheere-Terpstra test (JT-R, JT-A, JT-D), the KLH and the proposed test ( $Z_R, Z_A, Z_D$ ) and the proposed MAX3 when the random error term follows the centralized  $t$ -distribution.

| MAF  | KW-R  | KW-A  | KW-D  | F-R   | F-A   | F-D   | JT-R  | JT-A  | JT-D  | KLH   | $Z_R$ | $Z_A$ | $Z_D$ | MAX3  |
|------|-------|-------|-------|-------|-------|-------|-------|-------|-------|-------|-------|-------|-------|-------|
| 0.05 | 0.048 | 0.041 | 0.051 | 0.046 | 0.049 | 0.045 | 0.037 | 0.041 | 0.037 | 0.185 | 0.017 | 0.047 | 0.050 | 0.030 |
| 0.15 | 0.058 | 0.053 | 0.045 | 0.054 | 0.049 | 0.048 | 0.042 | 0.037 | 0.036 | 0.063 | 0.058 | 0.046 | 0.044 | 0.047 |
| 0.30 | 0.051 | 0.051 | 0.059 | 0.048 | 0.050 | 0.048 | 0.039 | 0.045 | 0.042 | 0.060 | 0.050 | 0.049 | 0.058 | 0.057 |
| 0.45 | 0.042 | 0.044 | 0.052 | 0.039 | 0.049 | 0.053 | 0.035 | 0.031 | 0.038 | 0.049 | 0.042 | 0.041 | 0.051 | 0.043 |

Figure S5. The empirical powers of the Kruskal-Wallis test, the F test, the Jonckheere-Terpstra test and the proposed test when the random error term follows the centralized  $t$ -distribution. The first column is for  $\beta_1 = \ln 1.2$  and the second column is for  $\beta_1 = \ln 1.4$ .

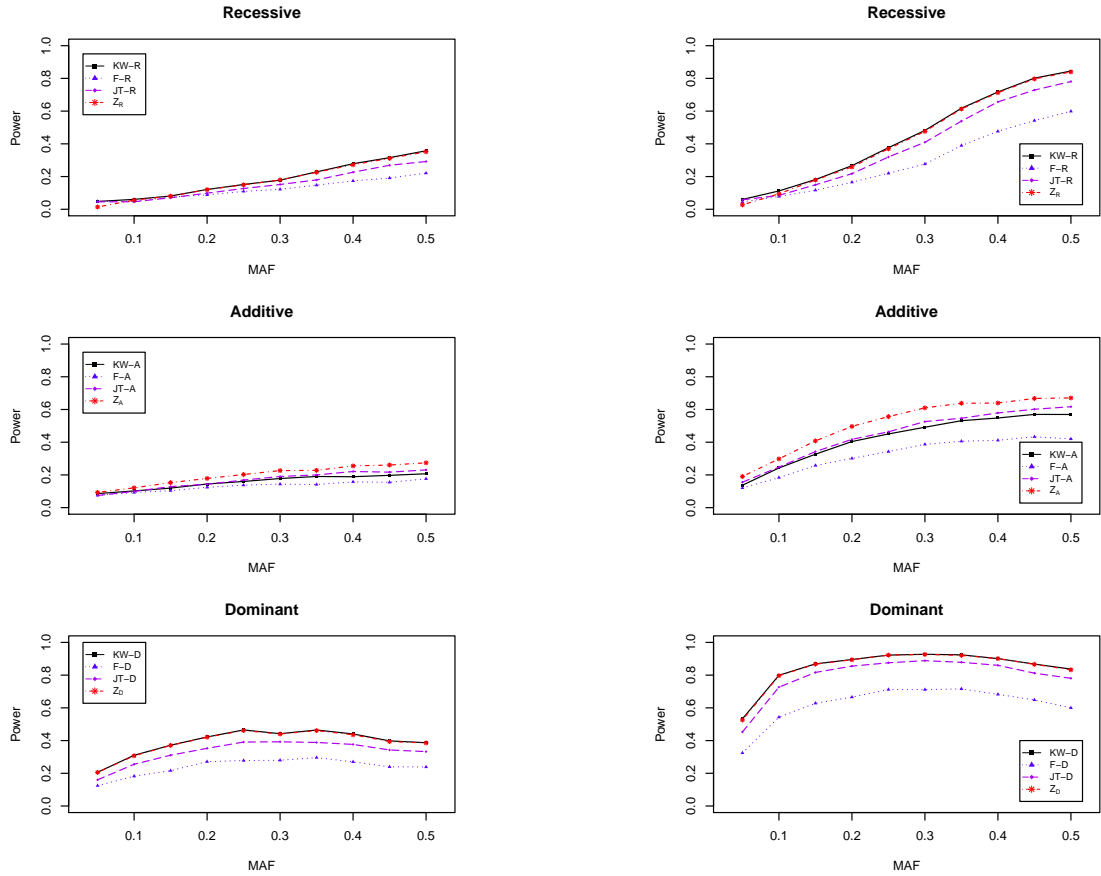

Figure S6. The empirical powers of the KW-A, F-A,  $Z_A$  and MAX3 test when the random error term follows the centralized  $t$ -distribution. The first column is for  $\beta_1 = \ln 1.2$  and the second column is for  $\beta_1 = \ln 1.4$ .

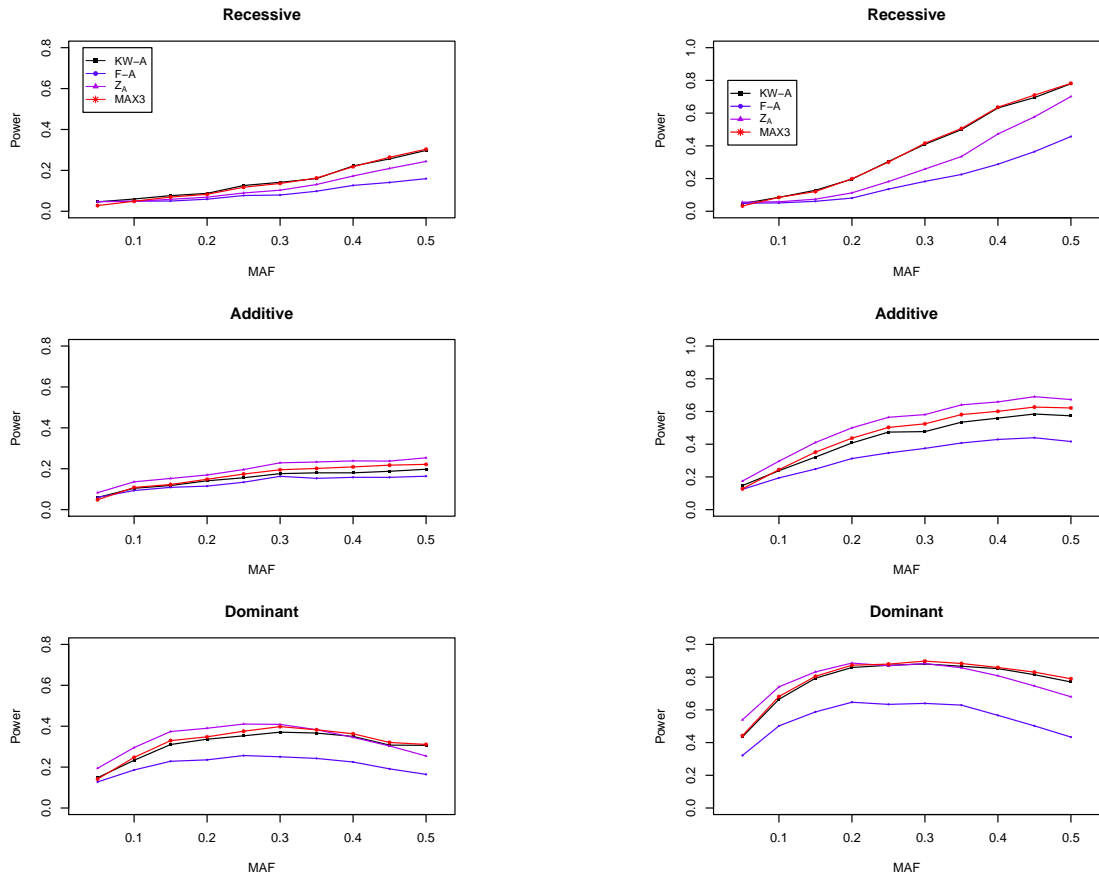

Supplement: srep12105-s1.pdf [file srep12105-s1.pdf]
